# Supplementary material for: Limits of Ligand Selectivity from Docking to Models: In Silico Screening for A1 Adenosine Receptor Antagonists
Source: PubMed Central journal article supplement (PMC3503826; doi:10.1371/journal.pone.0049910), 2012-11-21
Supplement: pone.0049910.s001.pdf [file pone.0049910.s001.pdf]

Table S1: Ligands that were tested and replaced less than 50% of radioligand at 10  $\mu$ M in all targets.

| ZINC ID  | SMILES                                                             | A <sub>1</sub> AR | A <sub>2A</sub> AR | A <sub>3</sub> AR | Model |
|----------|--------------------------------------------------------------------|-------------------|--------------------|-------------------|-------|
| 06844430 | <chem>CCOC(=O)c1cnc2nc(nn2c1[O-])NCc3cccc(c3)OC</chem>             | 3.4 $\pm$ 3.4%    | 0%                 | 11.1 $\pm$ 3.8%   | A     |
| 08653875 | <chem>CCOC(=O)Cc1c(nc2cc([nH]n2c1=O)c3ccc(cc3)Cl)C</chem>          | 0%                | 2.1 $\pm$ 2.1%     | 10.4 $\pm$ 5.0%   | A     |
| 05238266 | <chem>C[C@@H](C(=O)OC(C)C)Sc1nc(c(c(n1)[O-])C#N)c2ccccc2</chem>    | 20.3 $\pm$ 20.3%  | 7.6 $\pm$ 4.3%     | 25.3 $\pm$ 6.4%   | A     |
| 18284742 | <chem>CCOC(=O)Cc1c([nH]c2cc(nn2c1=O)c3ccc(cc3)C)C</chem>           | 8.9 $\pm$ 5.5%    | 8.1 $\pm$ 8.1%     | 20.7 $\pm$ 7.3%   | A     |
| 18156418 | <chem>CCOc1cccc1CNc2nc3nc4c(c(n3n2)[O-])CCC4</chem>                | 10.9 $\pm$ 10.9%  | 8.8 $\pm$ 6.3%     | 26.8 $\pm$ 8.1%   | A     |
| 40488321 | <chem>Cc1nc(nc(n1)Nc2[nH]c3ccccc3n2)c4ccccc4O</chem>               | 21 $\pm$ 2%       | 37 $\pm$ 4%        | 41 $\pm$ 2%       | B     |
| 08746576 | <chem>Cn1cccc1C(=O)CSc2n[nH]c3n2c4ccccc4n3</chem>                  | 28 $\pm$ 6%**     | 20 $\pm$ 4%        | 38 $\pm$ 4%       | B     |
| 20365432 | <chem>C[C@@H](c1ccnc2n1nc(n2)NC=[N+](C)C)Oc3cccc(c3)OC</chem>      | 33 $\pm$ 3%**     | 2 $\pm$ 2%         | 19 $\pm$ 5%       | B     |
| 31875387 | <chem>Cc1c(ccc(n1)C(=O)Nc2nc(cs2)c3ccc(cc3)F)C#N</chem>            | 11 $\pm$ 1%**     | 1 $\pm$ 1%         | 16 $\pm$ 7%       | B     |
| 54203984 | <chem>Cc1cccc(n1)NC(=O)[C@H]2CCC[NH+](C2)CC(=O)N3CCNC3=O</chem>    | 3 $\pm$ 3%        | 17 $\pm$ 5%        | 28 $\pm$ 2%       | C     |
| 56482974 | <chem>C[C@H](C(=O)Nc1ccc(c(c1)NC(=O)OC(C)(C)C)F)n2cc[nH+]c2</chem> | 5 $\pm$ 4%        | 45 $\pm$ 5%        | 53 $\pm$ 3%       | C     |
| 47260884 | <chem>Cc1cccc(n1)NC(=O)[C@H]2CCC[NH+](C2)CC(=O)NC3CCCC3</chem>     | 4 $\pm$ 4%        | 48 $\pm$ 3%        | 31 $\pm$ 6%       | C     |
| 31584575 | <chem>CN(Cc1[nH]c(=O)c2ccccc2n1)C(=O)/C=C/c3cccc(c3)C#N</chem>     | 12 $\pm$ 7%       | 12 $\pm$ 6%        | 19 $\pm$ 4%       | C     |
| 43348592 | <chem>c1ccc(cc1)Oc2ccccc2NC(=O)NC[C@@H](C(F)(F)F)O</chem>          | 3 $\pm$ 2%        | 4 $\pm$ 4%         | 23 $\pm$ 6%       | C     |
| 47260934 | <chem>Cc1cccc(n1)NC(=O)[C@H]2CCC[NH+](C2)CC(=O)NCC(C)C</chem>      | 10 $\pm$ 8%       | 53 $\pm$ 3%        | 31 $\pm$ 2%       | C     |
| 47260835 | <chem>CCNC(=O)NC(=O)C[NH+]1CCC[C@@H](C1)C(=O)Nc2cccc(n2)C</chem>   | 8 $\pm$ 4%        | 14 $\pm$ 3%        | 20 $\pm$ 5%       | C     |
| 08724684 | <chem>Cc1cccc2c1nc([nH]c2=O)/C(=C/c3ccc(c(c3)O)OC)/Cl</chem>       | 10 $\pm$ 5%       | 18 $\pm$ 4%        | 46 $\pm$ 5%       | D     |
| 06647942 | <chem>c1ccc2c(c1)c(=O)[nH]c(n2)CCC(=O)Nc3[nH]c4ccccc4n3</chem>     | 2 $\pm$ 2%        | 15 $\pm$ 4%        | 13 $\pm$ 3%       | D     |
| 04059122 | <chem>c1ccc2c(c1)c(=O)cc(o2)C(=O)Nc3nc(cs3)c4cccn4</chem>          | 4 $\pm$ 4%        | 27 $\pm$ 6%        | 34 $\pm$ 2%       | D     |

\*\*n=2
