# Supplementary material for: Limits of Ligand Selectivity from Docking to Models: In Silico Screening for A1 Adenosine Receptor Antagonists
Source: PubMed Central journal article supplement (PMC3503826; doi:10.1371/journal.pone.0049910), 2012-11-21
Supplement: pone.0049910.s002.pdf [file pone.0049910.s002.pdf]

Table S2: Compounds in ChEMBL most similar to the ligands identified in this study.

| ID | Closest ChEMBL | $sim_T$ | 2D-Structure                                                                         |
|----|----------------|---------|--------------------------------------------------------------------------------------|
| 7  | CHEMBL164087   | 0.53    | 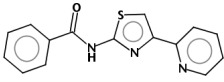   |
| 8  | CHEMBL163040   | 0.64    |    |
| 9  | CHEMBL605584   | 0.47    |    |
| 10 | CHEMBL164087   | 0.57    |    |
| 11 | CHEMBL164087   | 0.56    |    |
| 12 | CHEMBL165784   | 0.72    |    |
| 13 | CHEMBL165784   | 0.60    |    |
| 14 | CHEMBL204780   | 0.25    |   |
| 15 | CHEMBL321441   | 0.30    |  |
| 16 | CHEMBL162808   | 0.46    |  |
| 17 | CHEMBL611964   | 0.49    |  |
| 18 | CHEMBL1650339  | 0.41    |  |

continued on next page

Table S2 continued

|    |               |      |  |
|----|---------------|------|--|
| 19 | CHEMBL597167  | 0.41 |  |
| 20 | CHEMBL163040  | 0.71 |  |
| 21 | CHEMBL93600   | 0.39 |  |
| 22 | CHEMBL305516  | 0.32 |  |
| 23 | CHEMBL293437  | 0.50 |  |
| 24 | CHEMBL600404  | 0.42 |  |
| 25 | CHEMBL1097489 | 0.30 |  |
| 26 | CHEMBL1098786 | 0.27 |  |
